# Supplementary material for: Modulation of Endolysin LysECD7 Bactericidal Activity by Different Peptide Tag Fusion
Source: PubMed Central journal article supplement (PMC7175214; doi:10.3390/biom10030440), 2020-03-12
Supplement: biomolecules-10-00440-s001.pdf [file biomolecules-10-00440-s001.pdf]

# Modulation of Endolysin LysECD7 Bactericidal Activity by Different Peptide Tag Fusion

Nataliia P. Antonova <sup>1,2</sup>, Daria V. Vasina <sup>1,3</sup>, Evgeny O. Rubalsky <sup>4,8,9</sup>, Mikhail V. Fursov <sup>5</sup>, Alina S. Savinova <sup>1</sup>, Igor V. Grigoriev <sup>1</sup>, Evgeny V. Usachev <sup>1</sup>, Natalia V. Shevlyagina <sup>1</sup>, Vladimir G. Zhukhovitsky <sup>1,7</sup>, Vadim U. Balabanyan <sup>2</sup>, Vasiliy D. Potapov <sup>5</sup>, Andrey V. Aleshkin <sup>4</sup>, Valentine V. Makarov <sup>6</sup>, Sergey M. Yudin <sup>6</sup>, Alexander L. Gintsburg <sup>1,7</sup>, Artem P. Tkachuk <sup>1</sup> and Vladimir A. Gushchin <sup>1,2,\*</sup>

Supplementary materials



**Table S2.** Bacterial strains used to determine the Spectrum of activity of LysECD7-8his. Antibacterial activity\* of this protein and CFU reduction\* at concentration of protein upon treatment of  $10^3$  to  $10^5$  CFU/ml with 100  $\mu\text{g/ml}$ .

| Strain                                                                         | Source                             | Method of Identification                                               | Antibacterial Activity                                        | CFU Reduction, CFU/ml |                    |
|--------------------------------------------------------------------------------|------------------------------------|------------------------------------------------------------------------|---------------------------------------------------------------|-----------------------|--------------------|
| <i>Salmonella enterica</i> subsp. <i>enterica</i> serovar Enteritidis «Kaluga» | Animal infectious disease, chicken | Cultural, morphological and biochemical properties, serological typing | 97.92%                                                        | $4.95 \times 10^4$    |                    |
| <i>Salmonella enterica</i> subsp. <i>enterica</i> serovar Infantis 4632        | Animal infectious disease, chicken |                                                                        | 100.00%                                                       | $6.45 \times 10^4$    |                    |
| <i>Salmonella enterica</i> subsp. <i>enterica</i> serovar Tiphimurium «Lo»     | Animal infectious disease, pigeons |                                                                        | 100.00%                                                       | $2.27 \times 10^4$    |                    |
| <i>Salmonella enterica</i> subsp. <i>enterica</i> serovar Enteritidis 3B       | Animal infectious disease, chicken |                                                                        | 100.00%                                                       | $6.55 \times 10^4$    |                    |
| <i>Salmonella enterica</i> subsp. <i>enterica</i> serovar Infantis 2511        | Animal infectious disease, chicken |                                                                        | 100.00%                                                       | $8.60 \times 10^4$    |                    |
| <i>Salmonella enterica</i> subsp. <i>enterica</i> serovar Tiphimurium 415      | Animal infectious disease, chicken |                                                                        | 100.00%                                                       | $3.50 \times 10^3$    |                    |
| <i>Salmonella enterica</i> subsp. <i>enterica</i> serovar Tiphimurium 1281     | Animal infectious disease, chicken |                                                                        | 99.75%                                                        | $8.08 \times 10^4$    |                    |
| <i>Salmonella enterica</i> subsp. <i>enterica</i> serovar Tiphimurium Ufa      | Animal infectious disease, ducks   |                                                                        | 100.00%                                                       | $4.25 \times 10^4$    |                    |
| <i>Salmonella enterica</i> subsp. <i>enterica</i> serovar Tiphimurium #3       | Animal infectious disease, ducks   |                                                                        | 97.04%                                                        | $5.58 \times 10^4$    |                    |
| <i>Salmonella enterica</i> subsp. <i>enterica</i> serovar Tiphimurium #24      | Animal infectious disease, chicken |                                                                        | 92.07%                                                        | $6.45 \times 10^4$    |                    |
| <i>Salmonella enterica</i> subsp. <i>enterica</i> serovar Enteritidis 25       | Animal infectious disease, chicken |                                                                        | 98.43%                                                        | $3.98 \times 10^4$    |                    |
| <i>Salmonella enterica</i> subsp. <i>enterica</i> serovar Infantis 4631        | Animal infectious disease, chicken |                                                                        | 100.00%                                                       | $1.19 \times 10^5$    |                    |
| <i>Salmonella enterica</i> subsp. <i>enterica</i> serovar Infantis 4522        | Animal infectious disease, chicken |                                                                        | 100.00%                                                       | $6.30 \times 10^4$    |                    |
| <i>Salmonella enterica</i> subsp. <i>enterica</i> serovar Dublin immobilin 2   | Animal infectious disease, calf    |                                                                        | 99.88%                                                        | $8.19 \times 10^4$    |                    |
| <i>Salmonella enterica</i> subsp. <i>enterica</i> serovar Enteritidis «4B»     | Animal infectious disease, chicken |                                                                        | 99.50%                                                        | $3.98 \times 10^4$    |                    |
| <i>Salmonella enterica</i> subsp. <i>enterica</i> serovar Infantis «Kuzn»      | Animal infectious disease, chicken |                                                                        | 100.00%                                                       | $9.15 \times 10^4$    |                    |
| <i>Salmonella enterica</i> subsp. <i>enterica</i> serovar London N2            | Animal infectious disease, turkey  |                                                                        | 71.30%                                                        | $7.95 \times 10^4$    |                    |
| <i>Salmonella enterica</i> subsp. <i>enterica</i> serovar Tiphimurium G1       | Livestock wastes                   |                                                                        | Cultural, morphological and biochemical properties, MALDI-TOF | 99.49%                | $1.55 \times 10^5$ |
| <i>Salmonella</i>                                                              | Livestock                          |                                                                        | Cultural, morphological and                                   | 82.62%                | $2.52 \times 10^4$ |

| <i>enterica</i> subsp. <i>enterica</i> serovar<br>Enteritidis SEM4                   | wastes                                     | biochemical properties                                              |         |                         |
|--------------------------------------------------------------------------------------|--------------------------------------------|---------------------------------------------------------------------|---------|-------------------------|
| <i>Salmonella</i><br><i>enterica</i> subsp. <i>enterica</i> serovar Infantis<br>1271 | Livestock<br>wastes                        | Cultural, morphological and<br>biochemical properties,<br>MALDI-TOF | 91.52%  | 1.54 x 10 <sup>4</sup>  |
| <i>Pseudomonas aeruginosa</i> 1                                                      |                                            |                                                                     | 100.00% | 2.50 x 10 <sup>4</sup>  |
| <i>Pseudomonas aeruginosa</i> 2                                                      |                                            |                                                                     | 100.00% | 9.30 x 10 <sup>3</sup>  |
| <i>Pseudomonas aeruginosa</i> 3                                                      |                                            |                                                                     | 100.00% | 1.53 x 10 <sup>4</sup>  |
| <i>Pseudomonas aeruginosa</i> 4                                                      |                                            |                                                                     | 100.00% | 5.00 x 10 <sup>2</sup>  |
| <i>Pseudomonas aeruginosa</i> 5                                                      |                                            |                                                                     | 100.00% | 3.70 x 10 <sup>3</sup>  |
| <i>Pseudomonas aeruginosa</i> 6                                                      |                                            |                                                                     | 100.00% | 1.05 x 10 <sup>3</sup>  |
| <i>Pseudomonas aeruginosa</i> 7                                                      |                                            |                                                                     | 100.00% | 6.35 x 10 <sup>4</sup>  |
| <i>Pseudomonas aeruginosa</i> 8                                                      | Hospital strain,<br>inpatient<br>hospital  | Cultural, morphological and<br>biochemical properties,<br>MALDI-TOF | 100.00% | 1.66 x 10 <sup>4</sup>  |
| <i>Pseudomonas aeruginosa</i> 9                                                      |                                            |                                                                     | 100.00% | 1.13 x 10 <sup>4</sup>  |
| <i>Pseudomonas aeruginosa</i> 10                                                     |                                            |                                                                     | 100.00% | 7.75 x 10 <sup>3</sup>  |
| <i>Pseudomonas aeruginosa</i> 11                                                     |                                            |                                                                     | 81.90%  | 1.43 x 10 <sup>5</sup>  |
| <i>Pseudomonas aeruginosa</i> 12                                                     |                                            |                                                                     | 0%      | 0                       |
| <i>Pseudomonas aeruginosa</i> 13                                                     |                                            |                                                                     | 93.75%  | 3.00 x 10 <sup>5</sup>  |
| <i>Pseudomonas aeruginosa</i> 14                                                     |                                            |                                                                     | 47.79%  | 3.25 x 10 <sup>3</sup>  |
| <i>Pseudomonas aeruginosa</i> 15                                                     |                                            |                                                                     | 98.37%  | 1.48 x 10 <sup>5</sup>  |
| <i>Pseudomonas aeruginosa</i> 16                                                     |                                            |                                                                     | 96.19%  | 1.24 x 10 <sup>5</sup>  |
| <i>Pseudomonas aeruginosa</i> 3086                                                   | Reference<br>laboratory strain             |                                                                     | 99.75%  | 4.67 x 10 <sup>5</sup>  |
| <i>Pseudomonas aeruginosa</i> 1805                                                   | Hospital strain,<br>inpatient<br>hospital  | Cultural, morphological and<br>biochemical properties,<br>MALDI-TOF | 99.46%  | 5.57 x 10 <sup>4</sup>  |
| <i>Pseudomonas aeruginosa</i> PA01                                                   | Reference<br>laboratory strain             |                                                                     | 94.48%  | 5.95 x 10 <sup>5</sup>  |
| <i>Pseudomonas aeruginosa</i> B-1304                                                 | Reference<br>laboratory strain             | Cultural, morphological and<br>biochemical properties,<br>MALDI-TOF | 99.26%  | 3.77 x 10 <sup>5</sup>  |
| <i>Klebsiella pneumoniae</i> 1                                                       |                                            |                                                                     | 97.85%  | 5.24 x 10 <sup>4</sup>  |
| <i>Klebsiella pneumoniae</i> 2                                                       |                                            |                                                                     | 98.22%  | 4.42 x 10 <sup>4</sup>  |
| <i>Klebsiella pneumoniae</i> 3                                                       |                                            |                                                                     | 95.16%  | 5.90 x 10 <sup>4</sup>  |
| <i>Klebsiella pneumoniae</i> 4                                                       |                                            |                                                                     | 96.50%  | 5.94 x 10 <sup>4</sup>  |
| <i>Klebsiella pneumoniae</i> 5                                                       |                                            |                                                                     | 96.52%  | 8.74 x 10 <sup>4</sup>  |
| <i>Klebsiella pneumoniae</i> 6                                                       |                                            |                                                                     | 99.79%  | 9.63 x 10 <sup>4</sup>  |
| <i>Klebsiella pneumoniae</i> 7                                                       |                                            |                                                                     | 99.03%  | 5.60 x 10 <sup>4</sup>  |
| <i>Klebsiella pneumoniae</i> 8                                                       |                                            |                                                                     | 99.38%  | 9.64 x 10 <sup>4</sup>  |
| <i>Klebsiella pneumoniae</i> 9                                                       |                                            |                                                                     | 99.18%  | 9.67 x 10 <sup>4</sup>  |
| <i>Klebsiella pneumoniae</i> 10                                                      | Hospital strain,<br>inpatient<br>hospital  | Cultural, morphological and<br>biochemical properties               | 87.62%  | 6.44 x 10 <sup>4</sup>  |
| <i>Klebsiella pneumoniae</i> 11                                                      |                                            |                                                                     | 94.29%  | 3.63 x 10 <sup>4</sup>  |
| <i>Klebsiella pneumoniae</i> 12                                                      |                                            |                                                                     | 95.03%  | 8.70 x 10 <sup>4</sup>  |
| <i>Klebsiella pneumoniae</i> 13                                                      |                                            |                                                                     | 100.00% | 1.96 x 10 <sup>4</sup>  |
| <i>Klebsiella pneumoniae</i> 14                                                      |                                            |                                                                     | 99.22%  | 3.18E x 10 <sup>4</sup> |
| <i>Klebsiella pneumoniae</i> 15                                                      |                                            |                                                                     | 98.31%  | 9.59 x 10 <sup>4</sup>  |
| <i>Klebsiella pneumoniae</i> 16                                                      |                                            |                                                                     | 99.00%  | 5.94 x 10 <sup>4</sup>  |
| <i>Klebsiella pneumoniae</i> 17                                                      |                                            |                                                                     | 100.00% | 9.75 x 10 <sup>4</sup>  |
| <i>Klebsiella pneumoniae</i> 18                                                      |                                            |                                                                     | 96.95%  | 9.21 x 10 <sup>4</sup>  |
| <i>Klebsiella pneumoniae</i> 19                                                      |                                            |                                                                     | 99.73%  | 9.18 x 10 <sup>4</sup>  |
| <i>Klebsiella pneumoniae</i> 20                                                      |                                            |                                                                     | 92.16%  | 8.53 x 10 <sup>4</sup>  |
| <i>Klebsiella pneumoniae</i> Ts 104-14                                               | Hospital strain,<br>outpatient<br>hospital | Cultural, morphological and<br>biochemical properties,<br>MALDI-TOF | 72.65%  | 7.61 x 10 <sup>3</sup>  |
| <i>Escherichia coli</i> 96                                                           |                                            |                                                                     | 100.00% | 4.60 x 10 <sup>4</sup>  |
| <i>Escherichia coli</i> 532                                                          |                                            |                                                                     | 100.00% | 1.10 x 10 <sup>5</sup>  |
| <i>Escherichia coli</i> 502                                                          |                                            |                                                                     | 99.82%  | 1.41 x 10 <sup>5</sup>  |
| <i>Escherichia coli</i> 125                                                          | Hospital strain,<br>inpatient<br>hospital  | Cultural, morphological and<br>biochemical properties,<br>MALDI-TOF | 100.00% | 5.70 x 10 <sup>4</sup>  |
| <i>Escherichia coli</i> 636                                                          |                                            |                                                                     | 100.00% | 1.37 x 10 <sup>5</sup>  |
| <i>Escherichia coli</i> 16                                                           |                                            |                                                                     | 100.00% | 8.45 x 10 <sup>4</sup>  |
| <i>Escherichia coli</i> 110                                                          |                                            |                                                                     | 100.00% | 4.75 x 10 <sup>4</sup>  |
| <i>Escherichia coli</i> 158                                                          |                                            |                                                                     | 100.00% | 6.30 x 10 <sup>4</sup>  |

|                                         |                                            |                                                                     |                                            |                                                                     |        |                        |
|-----------------------------------------|--------------------------------------------|---------------------------------------------------------------------|--------------------------------------------|---------------------------------------------------------------------|--------|------------------------|
| <i>Escherichia coli</i> 452             |                                            |                                                                     | 100.00%                                    | 6.75 x 10 <sup>3</sup>                                              |        |                        |
| <i>Escherichia coli</i> 510             |                                            |                                                                     | 100.00%                                    | 6.55 x 10 <sup>4</sup>                                              |        |                        |
| <i>Escherichia coli</i> 663             |                                            |                                                                     | 100.00%                                    | 3.01 x 10 <sup>5</sup>                                              |        |                        |
| <i>Escherichia coli</i> 185             |                                            |                                                                     | 84.47%                                     | 1.31 x 10 <sup>4</sup>                                              |        |                        |
| <i>Escherichia coli</i> 515             |                                            |                                                                     | 100.00%                                    | 6.85 x 10 <sup>4</sup>                                              |        |                        |
| <i>Escherichia coli</i> 682             |                                            |                                                                     | 99.38%                                     | 2.40 x 10 <sup>4</sup>                                              |        |                        |
| <i>Escherichia coli</i> 108             |                                            |                                                                     | 100.00%                                    | 7.05 x 10 <sup>4</sup>                                              |        |                        |
| <i>Escherichia coli</i> 503             |                                            |                                                                     | 100.00%                                    | 1.10 x 10 <sup>5</sup>                                              |        |                        |
| <i>Escherichia coli</i> 632             |                                            |                                                                     | 100.00%                                    | 1.05 x 10 <sup>5</sup>                                              |        |                        |
| <i>Escherichia coli</i> 179             |                                            |                                                                     | 100.00%                                    | 1.72 x 10 <sup>4</sup>                                              |        |                        |
| <i>Escherichia coli</i> 201             |                                            |                                                                     | 100.00%                                    | 5.10 x 10 <sup>4</sup>                                              |        |                        |
| <i>Escherichia coli</i> 533             |                                            |                                                                     | 100.00%                                    | 3.85 x 10 <sup>4</sup>                                              |        |                        |
| <i>Acinetobacter baumannii</i> 145      |                                            |                                                                     | 98.72%                                     | 1.93 x 10 <sup>4</sup>                                              |        |                        |
| <i>Acinetobacter baumannii</i> 402      |                                            |                                                                     | 99.88%                                     | 4.20 x 10 <sup>4</sup>                                              |        |                        |
| <i>Acinetobacter baumannii</i> MA 65    |                                            |                                                                     | 99.81%                                     | 8.04 x 10 <sup>4</sup>                                              |        |                        |
| <i>Acinetobacter baumannii</i> 474      | Hospital strain,<br>inpatient<br>hospital  | Cultural, morphological and<br>biochemical properties,<br>MALDI-TOF | 97.49%                                     | 1.17 x 10 <sup>4</sup>                                              |        |                        |
| <i>Acinetobacter baumannii</i> 869      |                                            |                                                                     | 98.73%                                     | 9.33 x 10 <sup>4</sup>                                              |        |                        |
| <i>Acinetobacter baumannii</i> Bor      |                                            |                                                                     | 98.54%                                     | 1.15 x 10 <sup>5</sup>                                              |        |                        |
| <i>Acinetobacter baumannii</i> PA       |                                            |                                                                     | 99.17%                                     | 8.33 x 10 <sup>4</sup>                                              |        |                        |
| <i>Acinetobacter baumannii</i> 67GKB    |                                            |                                                                     | 99.85%                                     | 3.35 x 10 <sup>4</sup>                                              |        |                        |
| <i>Acinetobacter baumannii</i> Gar      |                                            |                                                                     | Hospital strain,<br>intensive care<br>unit | Cultural, morphological and<br>biochemical properties               | 99.84% | 9.14 x 10 <sup>4</sup> |
| <i>Acinetobacter baumannii</i> B-05     |                                            |                                                                     | Hospital strain,<br>inpatient<br>hospital  | Cultural, morphological and<br>biochemical properties,<br>MALDI-TOF | 99.42% | 2.55 x 10 <sup>4</sup> |
| <i>Acinetobacter baumannii</i> Ts 50-16 | Hospital strain,<br>intensive care<br>unit | Cultural, morphological and<br>biochemical properties               | 100.00%                                    | 1.53 x 10 <sup>5</sup>                                              |        |                        |
| <i>Enterobacter</i> sp. 1               |                                            |                                                                     | 99.77%                                     | 4.34 x 10 <sup>4</sup>                                              |        |                        |
| <i>Enterobacter</i> sp. 2               |                                            |                                                                     | 100.00%                                    | 1.41 x 10 <sup>4</sup>                                              |        |                        |
| <i>Enterobacter</i> sp. 3               |                                            |                                                                     | 100.00%                                    | 5.60 x 10 <sup>3</sup>                                              |        |                        |
| <i>Enterobacter</i> sp. 4               |                                            |                                                                     | 100.00%                                    | 1.59 x 10 <sup>4</sup>                                              |        |                        |
| <i>Enterobacter</i> sp. 5               | Hospital strain,<br>outpatient<br>hospital | Cultural, morphological and<br>biochemical properties,<br>MALDI-TOF | 100.00%                                    | 8.10 x 10 <sup>4</sup>                                              |        |                        |
| <i>Enterobacter</i> sp. 6               |                                            |                                                                     | 97.08%                                     | 4.32 x 10 <sup>4</sup>                                              |        |                        |
| <i>Enterobacter</i> sp. 7               |                                            |                                                                     | 98.97%                                     | 1.01 x 10 <sup>5</sup>                                              |        |                        |
| <i>Enterobacter</i> sp. 8               |                                            |                                                                     | 97.41%                                     | 1.70 x 10 <sup>4</sup>                                              |        |                        |
| <i>Enterobacter</i> sp. 9               |                                            |                                                                     | 99.71%                                     | 6.78 x 10 <sup>4</sup>                                              |        |                        |
| <i>Enterobacter</i> sp. 10              |                                            |                                                                     | 89.48%                                     | 2.60 x 10 <sup>4</sup>                                              |        |                        |

\*For all experiments, antimicrobial activity is shown as the mean value from three independent experiments. The antibacterial activity was expressed as follows: Antibacterial activity (%) = 100% - (CFU<sub>exp</sub>/CFU<sub>cont</sub>)x100%, where CFU<sub>exp</sub> is the number of bacterial colonies in the experimental culture plates, and CFU<sub>cont</sub> is the number of bacterial colonies in the control culture plates. . "100%" Antibacterial activity means zero colonies on CFU<sub>exp</sub> when plating 10 µl from initial experimental well. Antibacterial activity was arbitrarily regarded as meaningful when it was higher than 33%. CFU reduction value was obtained using the following equation: CFU reduction = CFU<sub>cont</sub> - CFU<sub>exp</sub>, where CFU<sub>exp</sub> is the number of bacterial colonies in the experimental culture plates, and CFU<sub>cont</sub> is the number of bacterial colonies in the control culture plates.

**Table S3.** Bacterial strains used to compare bactericidal activity of LysECD7-8his and LysECD7-SMAP. Antibacterial activity\* of these proteins and CFU reduction\* at concentration of protein upon treatment of  $10^3$  to  $10^5$  CFU/ml with 50  $\mu$ g/ml.

| Strain                                       | Source                               | Method of Identification                                      | Antibacterial Activity of LysECD7-8his | CFU Reduction      | Antibacterial Activity of LysECD7-SMAP | CFU Reduction      |
|----------------------------------------------|--------------------------------------|---------------------------------------------------------------|----------------------------------------|--------------------|----------------------------------------|--------------------|
| <i>Klebsiella pneumoniae</i> Ts 104-14       | Hospital strain, outpatient hospital |                                                               | 46.23%                                 | $4.84 \times 10^3$ | 100%                                   | $1.05 \times 10^4$ |
| <i>Pseudomonas aeruginosa</i> 12             | Hospital strain, inpatient hospital  | Cultural, morphological and biochemical properties, MALDI-TOF | 0%                                     | 0                  | 100%                                   | $1.52 \times 10^4$ |
| <i>Pseudomonas aeruginosa</i> 14             |                                      |                                                               | 34.23%                                 | $4.45 \times 10^3$ | 100%                                   | $3.68 \times 10^4$ |
| <i>Staphylococcus aureus</i> Z 73-14         | Hospital strain, outpatient hospital |                                                               | 0%                                     | 0                  | 99.91%                                 | $2.5 \times 10^5$  |
| <i>Staphylococcus haemolyticus</i> G 58-0916 |                                      |                                                               | 0%                                     | 0                  | 92.33%                                 | $1.34 \times 10^5$ |

\*For all experiments, antimicrobial activity is shown as the mean value from three independent experiments. The antibacterial activity was expressed as follows: Antibacterial activity (%) =  $100\% - (\text{CFU}_{\text{exp}}/\text{CFU}_{\text{cont}}) \times 100\%$ , where  $\text{CFU}_{\text{exp}}$  is the number of bacterial colonies in the experimental culture plates, and  $\text{CFU}_{\text{cont}}$  is the number of bacterial colonies in the control culture plates. "100%" Antibacterial activity means zero colonies on  $\text{CFU}_{\text{exp}}$  when plating 10  $\mu$ L from initial experimental well. Antibacterial activity was arbitrarily regarded as meaningful when it was higher than 33%. CFU reduction value was obtained using the following equation:  $\text{CFU reduction} = \text{CFU}_{\text{cont}} - \text{CFU}_{\text{exp}}$ , where  $\text{CFU}_{\text{exp}}$  is the number of bacterial colonies in the experimental culture plates, and  $\text{CFU}_{\text{cont}}$  is the number of bacterial colonies in the control culture plates.

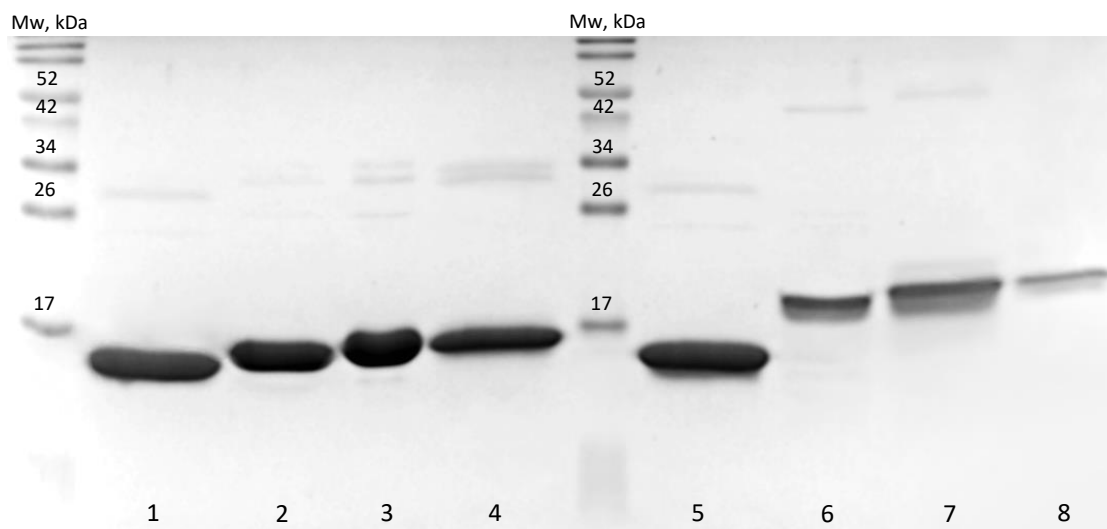

**Figure S1.** SDS-PAGE gel analysis of purified endolysins. 16% SDS-PAGE gel analysis of LysECD7 derivatives. Spectra™ Multicolor Broad Range Protein Ladder (Thermo Scientific, Vilnius, Lithuania) was used as a marker. 1 - LysECD7 (14.98 kDa), 2 - LysECD7-6his (15.7 kDa), 3 - LysECD7-8his (16.1 kDa), 4 - LysECD7-12his (16.5 kDa), 5 - LysECD7 (14.98 kDa), 6 - LysECD7-SMAP (17.18 kDa), 7 - LysECD7-flex-SMAP (18.16 kDa), 8 - LysECD7-rigid-SMAP (18.74 kDa).

A.

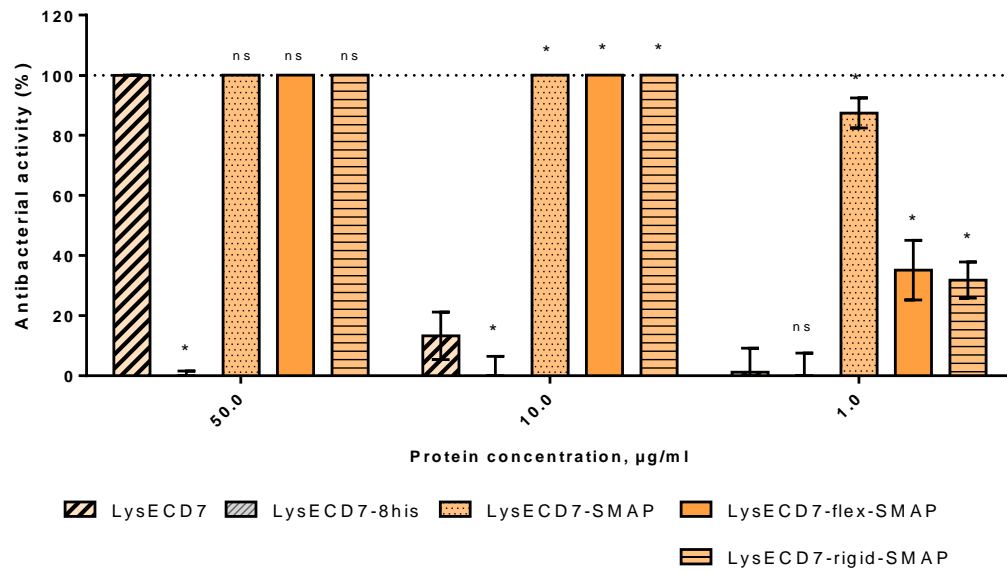

B.

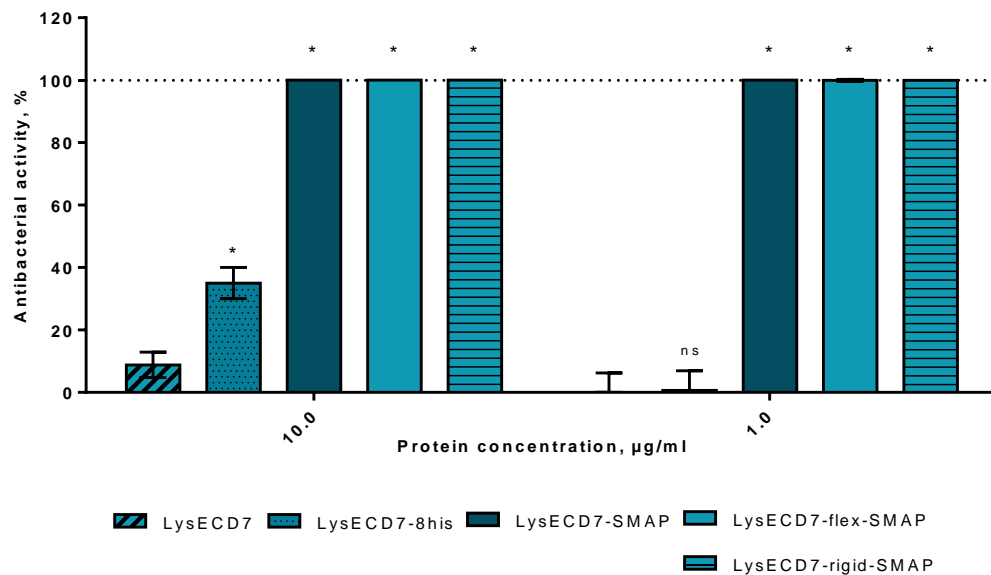

**Figure S2.** (a) Bactericidal activity of modified endolysins LysECD7 against *A. baumannii* Ts 50-16 in PBS buffer solution. For all experiments, the mean values are shown from three independent experiments ( $\pm$  standard deviation, SD). Asterisk (\*) indicates significant effect on bactericidal activity comparing to LysECD7 enzyme ( $p < 0.05$ , one-way ANOVA, Dunnett's multiple comparisons test). (b) Efficiency of modified endolysins LysECD7 under different conditions. Bactericidal activity of modified endolysins LysECD7 against stationary-phase cells of *A. baumannii* Ts 50-16. For all experiments the mean values are shown from three independent experiments ( $\pm$  standard deviation, SD). Asterisk (\*) indicates significant effect on bactericidal activity comparing to LysECD7 enzyme ( $p < 0.05$ , one-way ANOVA, Dunnett's multiple comparisons test).



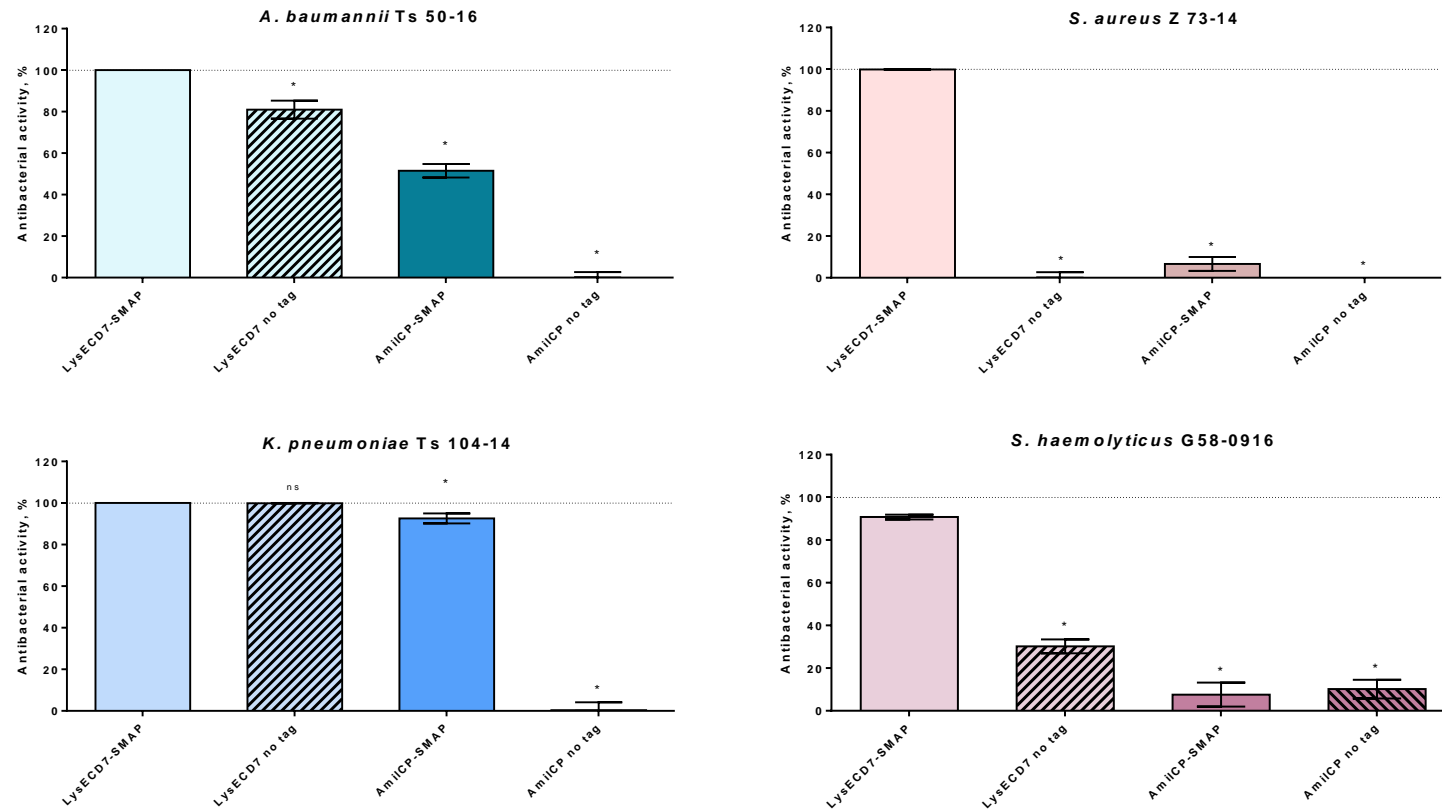

**Figure S3.** Influence of SMAP peptide introduction into the LysECD7 protein sequence on its antimicrobial activity. Bactericidal activity of LysECD7, its SMAP-modified version and SMAP peptide fused to a nonendolysin protein (AmiICP) against Gram-negative and Gram-positive isolates, diluted in 20 mM Tris HCl buffer pH 7.5. Proteins were assessed at following concentrations: 0.03  $\mu\text{M}$  (corresponding to 0.5  $\mu\text{g/ml}$  of LysECD7-SMAP protein) for *A. baumannii* Ts 50-16 and 2.9  $\mu\text{M}$  (corresponding to 50.0  $\mu\text{g/ml}$  of LysECD7-SMAP protein) for *Klebsiella* and *Staphylococcus* isolates. The culture dilution was 1 to  $3 \times 10^5$  CFU/ml. For all experiments the mean values are shown from three independent experiments ( $\pm$  standard deviation, SD). Asterisk (\*) indicates significant effect on bactericidal activity comparing to LysECD7-SMAP enzyme ( $p < 0.05$ , one-way ANOVA, Dunnett's multiple comparisons test).
